# Supplementary material for: MOF-derived CoSe2 microspheres with hollow interiors as high-performance electrocatalysts for the enhanced oxygen evolution reaction
Source: Royal Society of Chemistry journal article supplement (doi:10.1039/c7ta04662f), 2017-01-01
Supplement: c7ta04662f1.pdf [file c7ta04662f1.pdf]

*Supporting Information*

**MOF-Derived CoSe<sub>2</sub> Microspheres with Hollow Interiors as  
High-Performance Electrocatalysts for Enhanced Oxygen  
Evolution Reaction**

*Xiaobin Liu, Yongchang Liu, Li-Zhen Fan\**

Key Laboratory of New Energy Materials and Technologies, Institute of Advanced  
Materials and Technology, University of Science and Technology Beijing, Beijing  
100083, China

\*Tel./fax: +86 10 62334311. E-mail: fanlizhen@ustb.edu.cn (L.-Z. Fan).

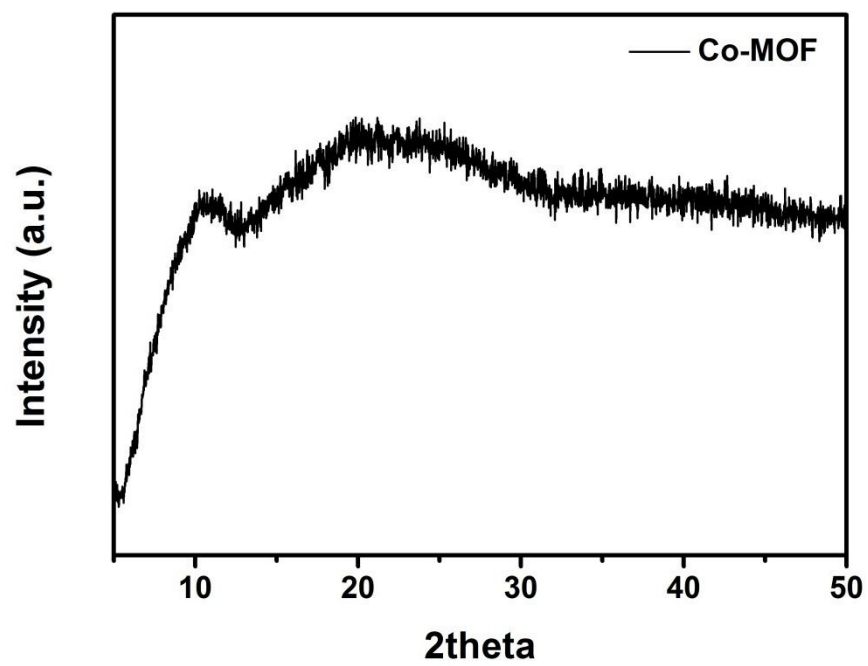

**Fig. S1** XRD pattern of Co-MOF.

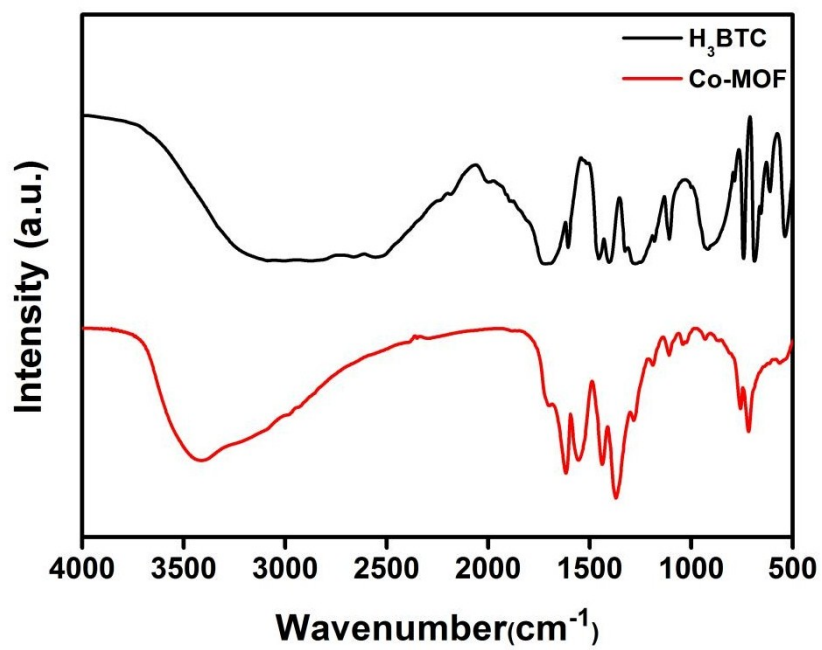

**Fig. S2** FT-IR spectra of Co-MOF and  $\text{H}_3\text{BTC}$ .

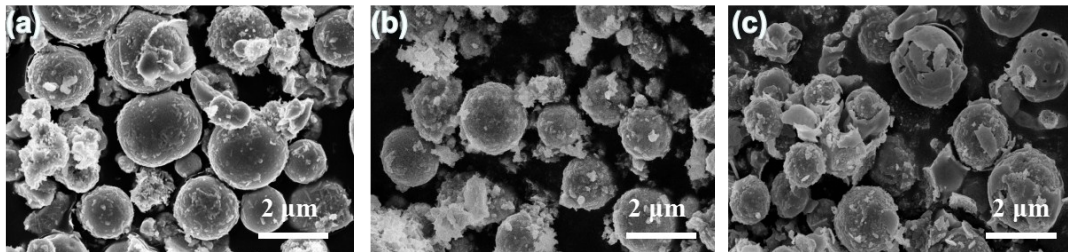

**Fig. S3** SEM images of (a)  $\text{CoSe}_2$ -400, (b)  $\text{CoSe}_2$ -450, and (c)  $\text{CoSe}_2$ -550.

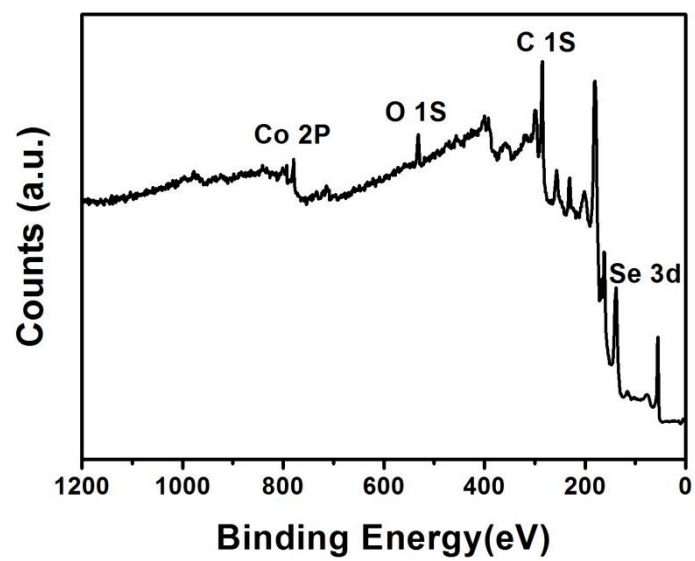

**Fig. S4** Survey XPS spectrum of CoSe<sub>2</sub>-450.

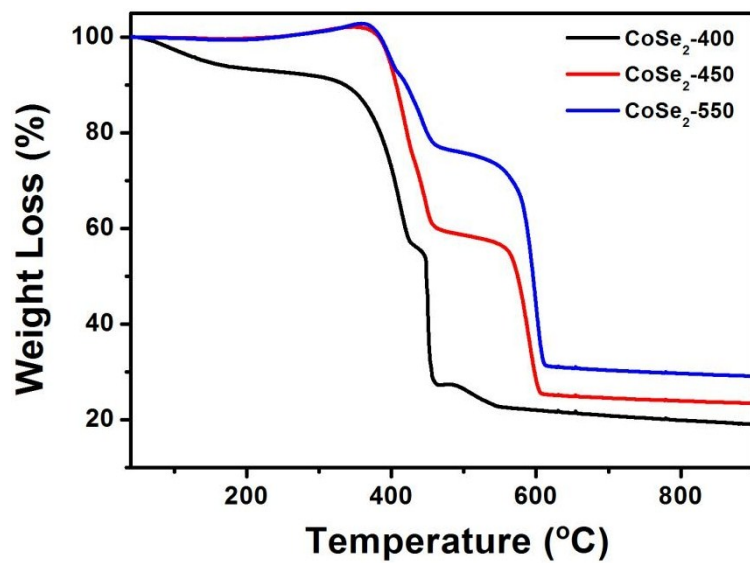

**Fig. S5** TGA plots of CoSe<sub>2</sub>-400, CoSe<sub>2</sub>-450, and CoSe<sub>2</sub>-550.

**Table S1.** The contents of CoSe<sub>2</sub> and carbon of CoSe<sub>2</sub>-400, CoSe<sub>2</sub>-450 and CoSe<sub>2</sub>-550.

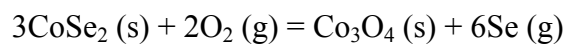

| Catalysts              | CoSe <sub>2</sub> (%) | C (%) |
|------------------------|-----------------------|-------|
| CoSe <sub>2</sub> -400 | 78.8                  | 21.2  |
| CoSe <sub>2</sub> -450 | 64.1                  | 35.9  |
| CoSe <sub>2</sub> -550 | 52.6                  | 47.4  |

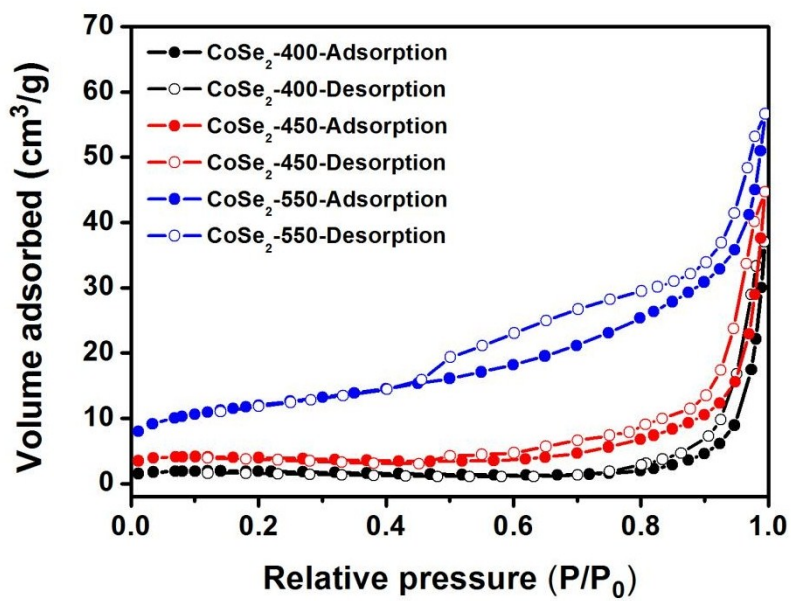

**Fig. S6** Nitrogen adsorption-desorption isotherms of CoSe<sub>2</sub>-400, CoSe<sub>2</sub>-450, and CoSe<sub>2</sub>-550.



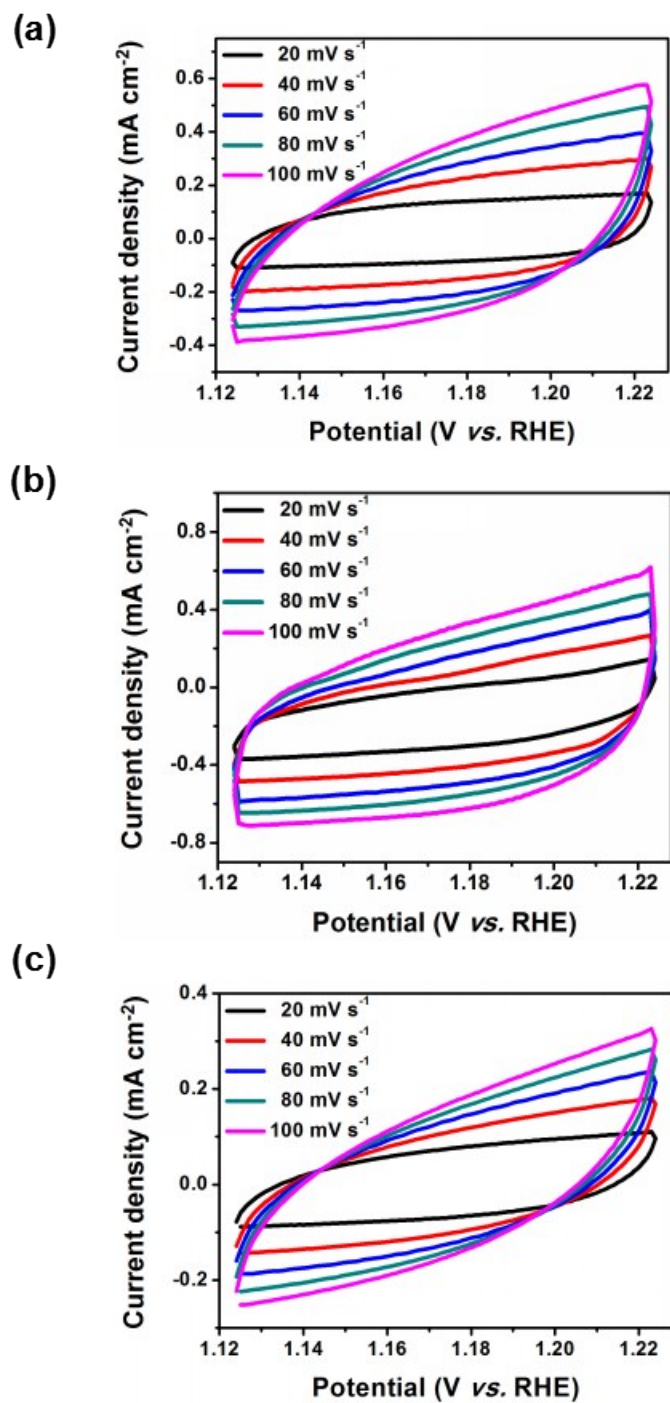

**Fig. S7** Cyclic voltammograms (1.124–1.224 V vs RHE) of (a) CoSe<sub>2</sub>-400, (b) CoSe<sub>2</sub>-450, and (c) CoSe<sub>2</sub>-550 recorded in 1.0 M KOH.

**Table S2.** Comparison of OER performance for CoSe<sub>2</sub>-450 with other CoSe<sub>2</sub> OER electrocatalyst.

| Electrocatalysts                                           | Onset potential (V vs. RHE) | Overpotential (mV vs.RHE) | Tafel slope (mV/dec) | Refs.     |
|------------------------------------------------------------|-----------------------------|---------------------------|----------------------|-----------|
| CoSe <sub>2</sub> -450                                     | 1.48                        | 330                       | 79                   | This work |
| Zn-doped CoSe <sub>2</sub> /CFC                            | 1.35                        | 356                       | 88                   | [S1]      |
| NG-CoSe <sub>2</sub> nanobelt                              | 1.52                        | 370                       | 40                   | [S2]      |
| Mn <sub>3</sub> O <sub>4</sub> /CoSe <sub>2</sub> nanobelt | 1.60                        | 450                       | 49                   | [S3]      |
| ultrathin CoSe <sub>2</sub>                                | 1.49                        | 320                       | 44                   | [S4]      |
| CoO/CoSe <sub>2</sub>                                      | 1.55                        | 337                       | 137                  | [S5]      |

### Supplementary References

[S1] Q. C. Dong, Q. Wang, Z. Y. Dai, H. J. Qiu and X. C. Dong, *ACS Appl. Mater. Interfaces*, 2016, **8**, 26902-26907.

[S2] M. Gao, X. Cao, Q. Gao, Y. Xu, Y. Zheng, J. Jiang and S. H. Yu, *ACS Nano*, 2014, **8**, 3970-3978.

[S3] M. Gao, Y. Xu, J. Jiang, Y. Zheng and S. H. Yu, *J. Am. Chem. Soc.*, 2012, **134**, 2930-2933.

[S4] Y. Liu, H. Cheng, M. Lyu, S. Fan, Q. Liu, W. Zhang, Y. Zhi, C. Wang, C. Xiao and S. Wei, *J. Am. Chem. Soc.*, 2014, **136**, 15670-15675.

[S5] K. D. Li, J. F. Zhang, R. Wu, Y. F. Yu and B. Zhang, *Adv. Sci.*, 2016, **3**, 1500426-1500433.
